# Human Chorionic Gonadotropin $\beta$ Induces Migration and Invasion via Activating ERK1/2 and MMP-2 in Human Prostate Cancer DU145 Cells

Zongwen Li<sup>1,2</sup>, Chunliu Li<sup>1,2</sup>, Lianlian Du<sup>1</sup>, Yan Zhou<sup>2</sup>, Wei Wu<sup>1,2\*</sup>

**1** Department of Epidemiology and Health Statistics, School of Public Health and Family Medicine, Capital Medical University, Beijing, China, **2** Department of Biochemistry, School of Basic Medical Sciences, Capital Medical University, Beijing, China

## Abstract

We previously demonstrated that human chorionic gonadotropin  $\beta$  (hCG $\beta$ ) induced migration and invasion in human prostate cancer cells. However, the involved molecular mechanisms are unclear. Here, we established a stable prostate cancer cell line overexpressing hCG $\beta$  and tested hCG $\beta$ -triggered signaling pathways causing cell migration and invasion. ELISA showed that the hCG $\beta$  amount secreted into medium increased with culture time after the hCG $\beta$ -transfected cells were incubated for 3, 6, 9, 12 and 24 h. More, hCG $\beta$  standards promoted MAPK (ERK1/2) phosphorylation and increased MMP-2 expression and activity in both dose- and time-dependent manners in hCG $\beta$  non-transfected cells. In addition, hCG $\beta$  promoted ERK1/2 phosphorylation and increased MMP-2 expression and activity significantly in hCG $\beta$  transfected DU145 cells. Whereas ERK1/2 blocker PD98059 (25  $\mu$ M) significantly downregulated phosphorylated ERK1/2 and MMP-2. Particularly, hCG $\beta$  promoted cell migration and invasion, yet the PD98059 diminished the hCG $\beta$ -induced cell motility under those conditions. These results indicated that hCG $\beta$  induced cell motility via promoting ERK1/2 phosphorylation and MMP-2 upregulation in human prostate cancer DU145 cells.

**Citation:** Li Z, Li C, Du L, Zhou Y, Wu W (2013) Human Chorionic Gonadotropin  $\beta$  Induces Migration and Invasion via Activating ERK1/2 and MMP-2 in Human Prostate Cancer DU145 Cells. PLoS ONE 8(2): e54592. doi:10.1371/journal.pone.0054592

**Editor:** Salvatore V. Pizzo, Duke University Medical Center, United States of America

**Received:** June 11, 2012; **Accepted:** December 14, 2012; **Published:** February 12, 2013

**Copyright:** © 2013 Li et al. This is an open-access article distributed under the terms of the Creative Commons Attribution License, which permits unrestricted use, distribution, and reproduction in any medium, provided the original author and source are credited.

**Funding:** This study was funded by Science and Development Plan of Beijing Education Committee (grant number: KM200910025008) and National Natural Science Foundation of China (grant number: 81272843). The funders had no role in study design, data collection and analysis, decision to publish, or preparation of the manuscript.

**Competing Interests:** The authors have declared that no competing interests exist.

\* E-mail: weiwu207@ccmu.edu.cn

These authors contributed equally to this work.

## Introduction

Prostate cancer is one of the most commonly diagnosed cancers and the sixth leading cause of death in the males in the world [1]. Currently, the main methods for the treatment of prostate cancer are radical prostatectomy, external beam radiation therapy, brachytherapy, systemic androgen deprivation therapy and chemotherapy, etc. [2–6]. But the therapeutic efficacy is unsatisfactory. Development of new therapy such as molecular therapy is necessary for treating prostate cancer. But the characterization of the molecular mechanisms causing prostate cancer is the basis for establishing a new therapy. If we determine the therapeutic molecular targets that contributed to prostate cancer first, then we can treat patients via targeting those tumor markers to inhibit prostate cancer, further improve the prognosis and lower the mortality.

Human chorionic gonadotropins (hCGs) are heterodimeric glycoproteins secreted by trophoblastic cells in normal pregnancy. HCGs have a few isoforms containing intact hCG, hCG $\alpha$ , hCG $\beta$ , hyperglycosylated (hCGh), nicked (hCGn) and core fragment of hCG $\beta$  (hCG $\beta$ cf) [7]. HCG $\beta$  is a molecule with independent function. It has been shown that free hCG $\beta$  is a potential tumor marker produced by a variety of tumors [8–10]. We previously reported that hCG $\beta$  decreased E-cadherin expression leading to

migration and invasion in prostate cancer cells [11]. However, the involved whole mechanisms are not clear.

Extracellular signal-regulated kinase1/2 (ERK1/2) activation has been implicated in carcinogenesis and cancer progression. Increased ERK1/2 activity promotes cancer cell proliferation and metastasis in various cancer cell lines [12–15]. ERK1/2 blocker, PD98059 resulted in a reduction of cell growth and invasiveness in prostate cancer. In MA-10 Leydig cells, hCG triggered transient ERK1/2 activation via upstream protein kinase A (PKA) [12]. In addition, hCG also induces ERK1/2 phosphorylation in a PKA-independent manner in endometrium and is involved in carcinogenesis [13,14]. Besides, there is evidence that matrix metalloproteinases (MMPs) expression was regulated by ERK1/2 in invasive carcinomas. Studies showed that activated ERK1/2 regulated the activity of MMPs leading to extracellular matrix (ECM) degradation and cell motility [13–15]. Many MMPs are considered as essential proteases in the ECM degradation and remodeling [16]. Report showed that hCG stimulated the secretion of MMP-2 and MMP-9 in a dose-dependent manner in cytotrophoblastic cells [17]. Further, hCG upregulated MMP-2 activity and promoted cell motility in SGHPL-5 cell lines [18]. In human prostate cancer, enhanced MMP-2 and MMP-9 activity contributed to tumor invasion and metastasis [19–21]. Studies showed that vitamin D and Vitamin D analog ZK191784 downregulated MMPs to

inhibit invasion in prostate cancer [22–24]. Undoubtedly, MMPs are the important anti-invasion targets. Hence, we propose that hCG $\beta$  might increase ERK1/2 phosphorylation and further upregulate MMPs to promote cell motility.

Consequently, here we will investigate hCG $\beta$ -triggered signaling pathways and the linkage between hCG $\beta$  expression and cell motility. Through this study, we hope that we will find new clues in molecular therapy to treat prostate cancer.

## Materials and Methods

### Materials

HCG $\beta$  standards were purchased from Abcam (Hong Kong). The construct pVSneo-hCG $\beta$  containing hCG $\beta$  cDNA was purchased from Stratagene (La Jolla, CA). Restriction enzymes Sall, XhoI, EcoRI, BamHI, HindIII and T4 DNA ligase, competent cells are the products of Invitrogen (Carlsbad, CA). G418 and crystal violet were purchased from Sigma (St. Louis, MO). Human prostate cancer DU145 and PC3 (to be a backup) cells were the products of American Typical Culture Collection (Rockville, MD). Cells were cultured in DMEM medium (Hyclone) supplemented with 10% fetal bovine serum (Invitrogen), 100 units/mL penicillin, and 100  $\mu$ g/mL streptomycin at 37°C, 95% air and 5% CO<sub>2</sub>. Transwell plates with inner inserts or artificial basement membranes were bought from BD Biosciences (Bedford, MA). Anti-hCG $\beta$  was from BioDesign International (Saco, ME); anti-ERK1/2, anti-phospho-ERK1/2 and anti-MMP-2 were purchased from Cell Signaling Technology, Inc (Shanghai, China).

### Transfection

Via transfection, we established stable cell line overexpressing hCG $\beta$  in DU145 cells. The control vector pVSneo-vector was made by cutting hCG $\beta$  cDNA by restriction enzymes first and then autoligation as described previously [11]. Cells were seeded in six-well plates with DMEM growing medium. When the cells come to 90% confluency, the constructs containing the pVSneo-hCG $\beta$  or pVSneo-Vector were transfected into DU145 cells following FuGene HD transfection reagent (Roche, USA) and the manufacturer's instructions. After the cells were incubated at 37°C

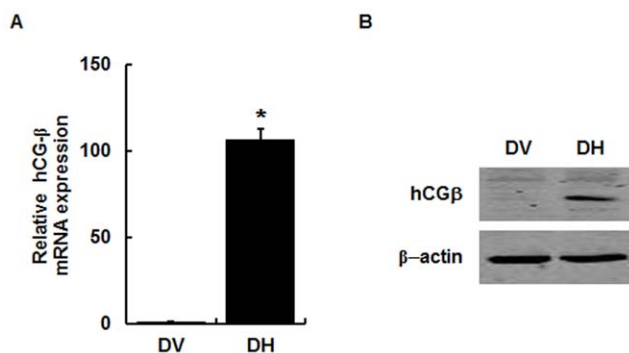

**Figure 1. HCG $\beta$  expression and secretion after the cells were grown for 24 hours.** (A) Quantitative analysis of hCG $\beta$  mRNA and  $\beta$ -actin mRNA transcription in DV and DH cells by Real-time PCR. DV: DU145 cell transfected with empty vector; DH: DU145 cells transfected with hCG $\beta$  cDNA construct. Note that hCG $\beta$  mRNA was highly expressed versus control. (B) Analysis of hCG $\beta$  protein expression by Western blot.  $\beta$ -actin was used for equal loading and normalization. The results indicated that hCG $\beta$  was highly expressed in DH cells. \*, indicates  $P < 0.05$  versus control DV cells. Data were shown as means  $\pm$  SEM from three separate tests. doi:10.1371/journal.pone.0054592.g001

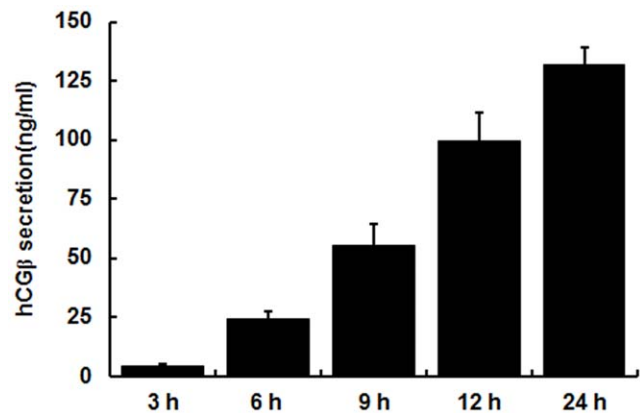

**Figure 2. HCG detection in the culture medium via ELISA.** Data showed that there was hCG $\beta$  secreted into cell medium. Furthermore, the level of hCG $\beta$  secreted into medium increased with time after the hCG $\beta$  transfected cells were incubated for 3, 6, 9, 12 and 24 h. doi:10.1371/journal.pone.0054592.g002

for 48 hours, the cells were digested by trypsin-EDTA and grown in the selection medium containing G418 (1.2 mg/mL). Further, cells were incubated for two more weeks. The cells without integration of hCG $\beta$  gene were dead and floating in the medium and the single colonies which stably express hCG $\beta$  were collected. The screened cells were cultured in selection medium (600  $\mu$ g/mL G418) for two more weeks until no dead cells were found. The selected cells were maintained in medium containing 600  $\mu$ g/mL G418 for further test. We succeeded in establishing the stable cell lines in the previous work [11]; here we used a new transfection reagent to enhance transfection efficiency.

### Real-time PCR

Cells were grown as the routine procedures in the culture medium. Then, total RNA was isolated using TriZol Reagent (Invitrogen, USA). HCG $\beta$  cDNA was made using Reverse Transcriptase Kit (TaKaRa, China) with 1.5  $\mu$ g of total RNA following the manufacturer's instruction. Real-time PCR was performed on a Stratagene Mx3000P instrument. For real-time thermal cycling, triplicate aliquots of cDNA were used in a reaction mixture containing 250 nM of each primer in a reaction volume of 25  $\mu$ l by the PrimeScript<sup>TM</sup> RT reagent Kit (TaKaRa, China). The PCR cycling program was run with an initial predenaturation step at 94°C for 60 s, then with a 40 cycle of amplification steps, at 94°C for 30 s, 57°C for 30 s, 72°C for 20 s. The primers were as follows:

hCG $\beta$  (forward): 5'-TCTGTGCCGGCTACTGCCCC-3';

hCG $\beta$  (reverse): 5'-TTGGGACCCCCGCAGTCAGT-3';

$\beta$ -actin (forward): 5'-AACTCCATCATGAAGTGTGACG-3';

$\beta$ -actin (reverse): 5'-GATCCACATCTGCTGGAAGG-3'.

Data was collected and analyzed following the manufacturer's manual instruction.

### ELISA

HCG $\beta$  is a secreted protein, which might interact with some receptors, such as luteinizing hormone receptor, etc. to play a role in triggering the signaling pathways. Therefore we need to make sure that expressed hCG $\beta$  was secreted into cell medium. After the stable DU145 cells were grown to 70% conuency in the growing medium, the cells were washed for three times with serum-free DMEM medium. Then the cells were cultured in serum-free

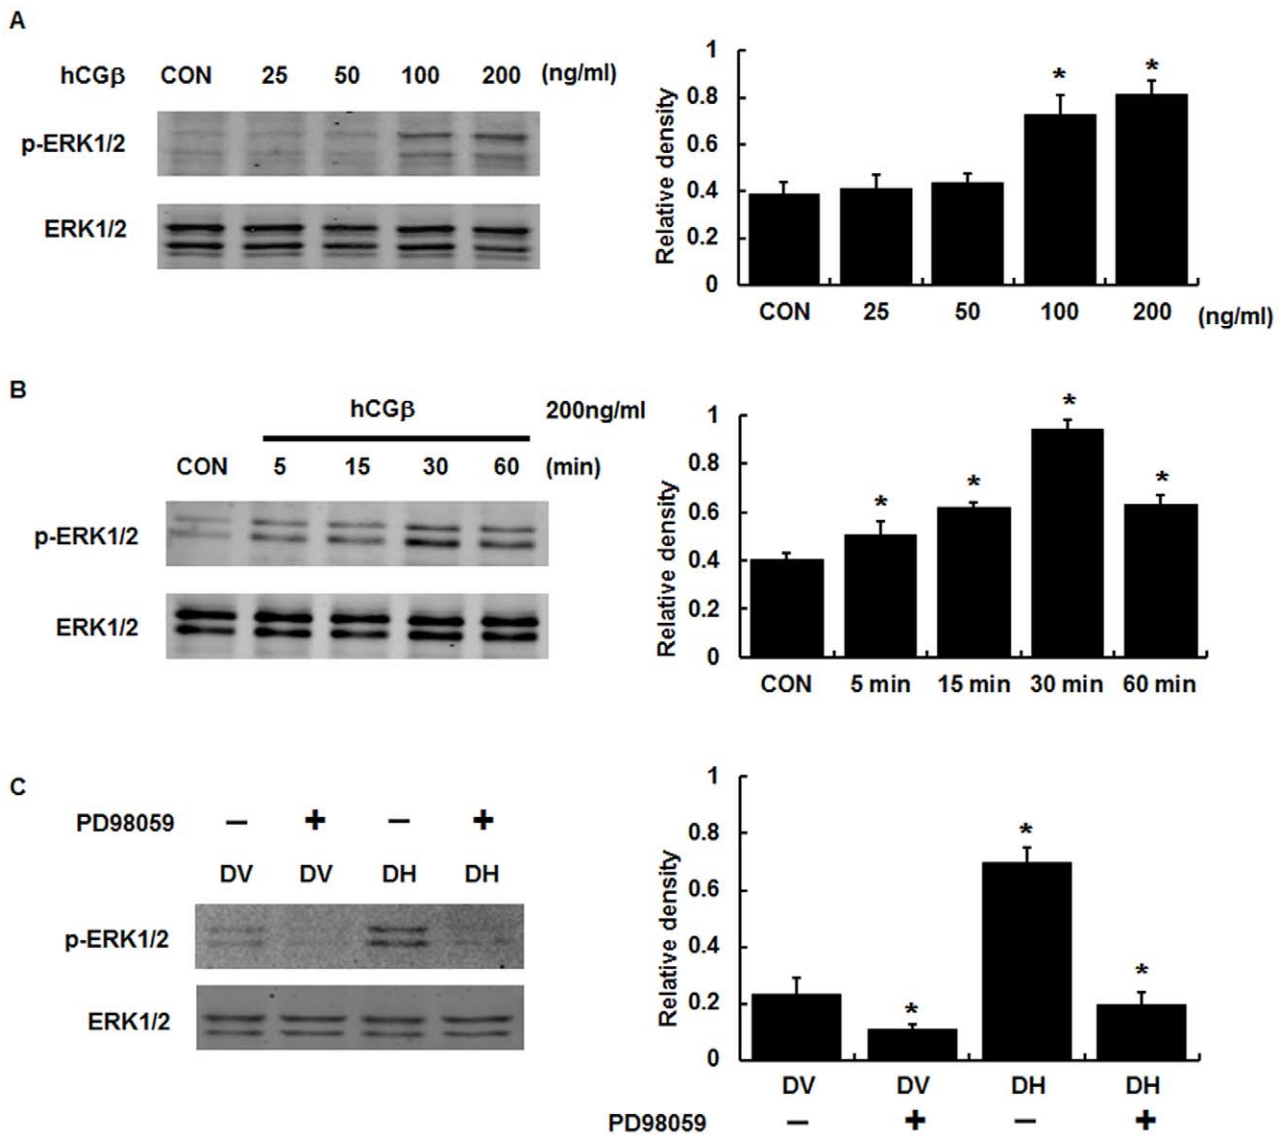

**Figure 3. HCG phosphorylated ERK1/2.** (A) We have demonstrated that the concentration of 200 ng/ml hCGβ standards induced cell invasion [11]. Thus, here we treated non-transfected DU145 cells with different doses of 0, 25, 50, 100, and 200 ng/ml hCGβ for 1 h. Western blot showed that hCGβ standards phosphorylated ERK1/2 in a dose-dependent trend. At the concentration of 200 ng/ml, ERK1/2 activation reached the peak. (B) Non-transfected DU145 cells in serum-free medium were treated with 200 ng/ml hCGβ for 0, 5, 15, 30 and 60 min. Western blot showed that hCGβ activated ERK1/2 in a time-dependent manner. At the time point of 30 min, ERK1/2 phosphorylation reached the peak and then went down. (C) The cells were pretreated with PD98059 (25 μM) 30 min and then incubated for 24 h in serum-free medium, Western blot showed that hCGβ activated ERK1/2, but PD98059 decreased ERK1/2 activation. \*, indicates  $P < 0.05$  versus DV. Data were shown as means ± SEM from three separate tests. doi:10.1371/journal.pone.0054592.g003

DMEM medium at 3, 6, 9, 12 and 24 h. The medium was collected at the indicated time points and the ELISA was performed to test secreted hCGβ via a β-hCG ELISA kit (DRG Diagnostics, New Jersey, USA) following the manufacturer’s instruction. In the previous study, we succeeded in detecting the hCGβ secretion in hCGβ transfected cells via an hCGβ detection Kit, F-hCGβ cubind ELISA, from Monobind (Costa Mesa, CA) [11]. In order to reproduce and confirm these results, we used a β-hCG ELISA kit to determine hCGβ secretion.

**Immunoblotting**

After the DU145 cells were cultured for the required time, cells were collected and lysed with lysis buffer (25 mM Tris-HCl pH 7.6, 150 mM NaCl, 1% NP-40, 0.1% SDS, 1% sodium

deoxycholate and protease inhibitors, Thermo Scientific, USA). Cell lysate was centrifuged at 18,000 g for 20 min. Total protein concentrations were tested by BCA Protein Assay Kit (Invitrogen). Eighty microgram of protein was loaded on 10% SDS-PAGE gels and run for required time depending on the molecular weight, then transferred to nitrocellulose membranes via the semi-dry transfer. The membranes were blocked in 1.5% BSA in TBS-T buffer for 1 h at room temperature with gentle shaking, then were incubated with primary antibodies separately, at 4°C, overnight. After washing with TBST 3×10 minutes each, the membranes were probed with the uorescence-labeled secondary antibody (LI-COR Bioscience, Lincoln, NE) for 1 h at room temperature. After three washes, the membranes were scanned in the 700 or 800 channels using the Odyssey Infrared Imaging System (LI-COR

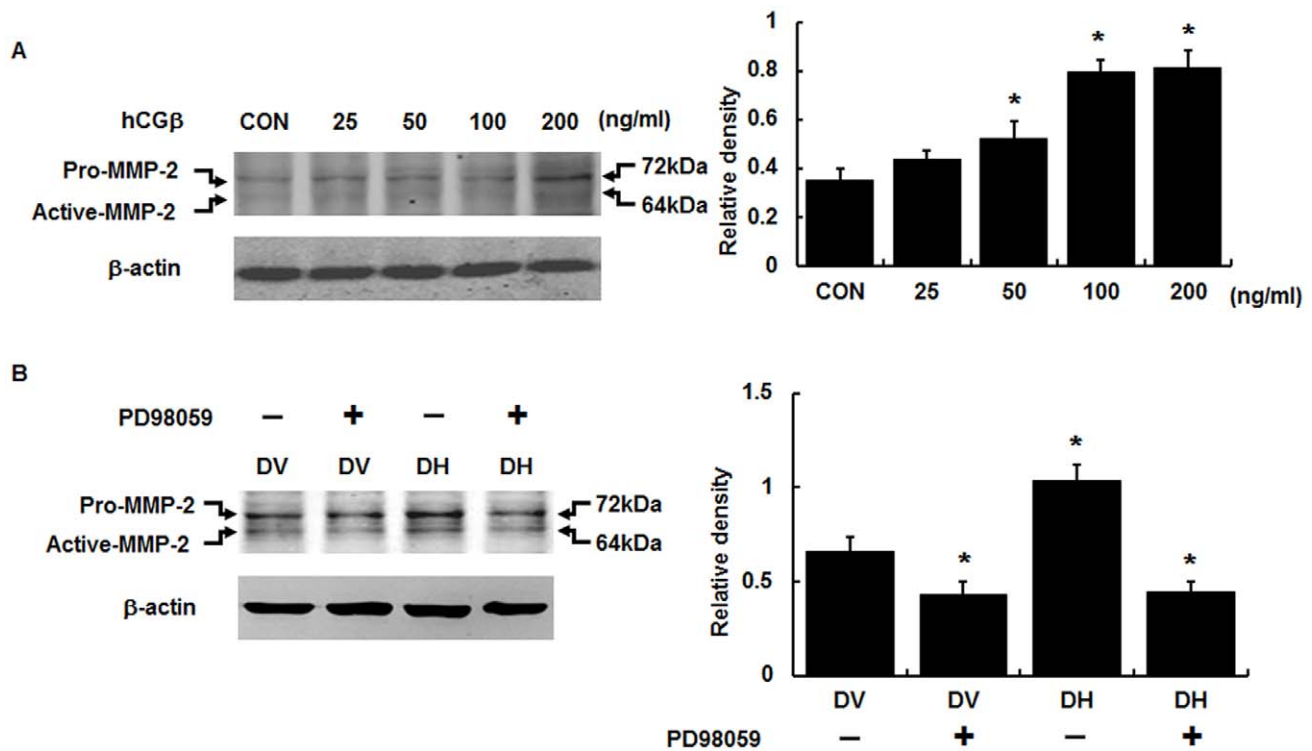

**Figure 4. HCG $\beta$  increased MMP-2 expression and via ERK1/2.** (A) We treated non-transfected DU145 cells with 0, 25, 50, 100, and 200 ng/ml hCG $\beta$  for 1 h, Western blot indicated that hCG $\beta$  standards upregulated MMP-2 in a dose-dependent manner, at the concentration of 200 ng/ml, MMP-2 expression reached the peak. (B) We treated DH and DV cells with or without PD98059 (25  $\mu$ M) 30 min and then incubated for 24 h with serum-free medium, Western blot showed that hCG $\beta$  upregulated MMP-2 expression and PD98059 abolished those increase. The sizes for pro-MMP-2 and active-MMP-2 are 72 Kd and 64 Kd, respectively. \*, indicates  $P < 0.05$  versus control. Data were shown as means  $\pm$  SEM from three separate tests. doi:10.1371/journal.pone.0054592.g004

Bioscience, Lincoln, NB, USA).  $\beta$ -actin was used for equal loading and normalization. Antibodies were diluted appropriately.

### Gelatin Zymography

After the ERK1/2 blocker PD98059 (25  $\mu$ M) was applied to treat DU145 cells for 2 h, we changed the 10% fetal bovine serum DMEM medium into serum-free medium, and cultured for 24 hours. Medium with secreted hCG $\beta$  was collected from an equal number of cells and mixed with equal amounts of non-reduced sample buffer. The equal volumes of medium were electrophoresed on 10% SDS-polyacrylamide gels containing 1 mg/ml gelatin as a protease substrate. The gel was washed in 2.5% Triton X-100 solution at room temperature with gentle agitation and was soaked in the buffer (50 mM Tris-HCl, pH 7.5, 0.2 M NaCl, 5 mM CaCl $_2$ ·2 H $_2$ O, and 0.02% Brij-35, pH 7.6) at 37°C for 42 hours. After incubation, the gel was stained for 30 min with staining solution (0.5% Coomassie Brilliant Blue, 25% isopropanol, and 10% acetic acid). Then the stained gel was destained with an appropriate Coomassie R-250 destaining solution (50% methanol, 10% acetic acid). In the area with matrix metalloproteinases, clear bands against a dark blue background will show up. To show equal loading, a parallel SDS gel was run to test MMP-2 and  $\beta$ -actin via Western blot.

### Cell Motility Assays

Prostate cancer cell migration was done in a 24-well plate with inner chamber; the chamber bottom has 8  $\mu$ m pores. Total  $1 \times 10^5$  cells were seeded in the upper chamber with 500  $\mu$ l serum-free medium, and 1 ml DMEM medium with 10% fetal bovine serum

was added in the lower chamber. After the cells were grown for 6 hours, the cells on the upper chamber were removed with a cotton swab. The migrated cells (or pseudopodia) on the bottom of the chamber were fixed with 100% methanol for 10 min at -20°C, then stained with 0.5% crystal violet solution at room temperature for 10 min. After moving away the crystal violet solution, the cells were rinsed with distilled water until no excess dye was viewed. The migrated cells or pseudopodia were photographed and counted from 5 randomly selected areas; the images were photographed with camera with a Leica DM IRB microscope at  $\times 200$  magnification. Invasion assay was performed by the Tumor Invasion System (8  $\mu$ m pore, BD BioCoat). The bottom of cell culture insert was coated with artificial basement membrane coated with matrigel. Basement membrane is thin extracellular matrix underlying epithelial cells. Matrigel is a commercial product extracted from a mouse sarcoma rich in extracellular matrix proteins. The major component is laminin, followed by collagen IV and heparin sulfate proteoglycans. The other procedures are the same as in the migration assay.

### Statistical Analysis

Data were subjected to analysis of variance with posttests for comparison among specific groups. Data were expressed as means  $\pm$  SEM and analyzed for statistical significance using analysis of variance (ANOVA). Bonferroni corrections for multiple comparisons against a single group were used.  $P < 0.05$  was considered statistically significant. The minimum number of repetitive experiments was 3.

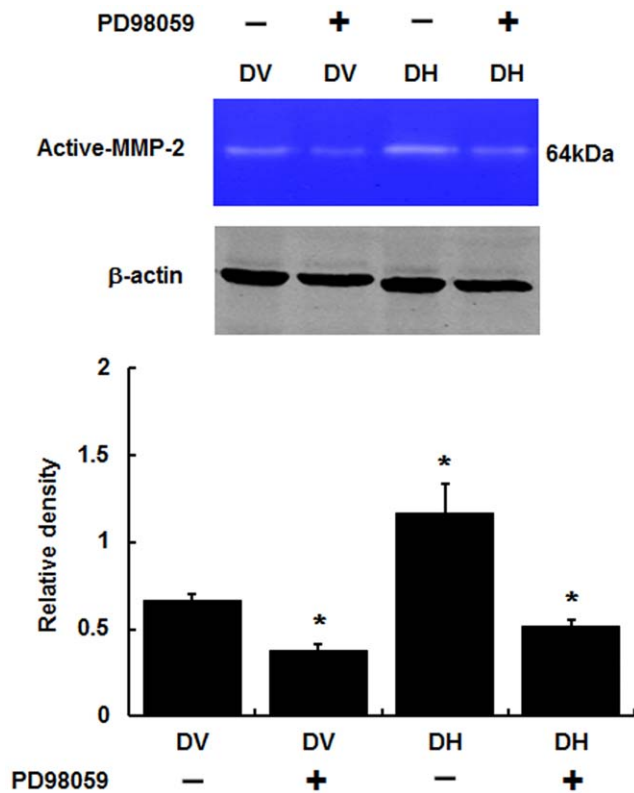

**Figure 5. HCG $\beta$  increased MMP-2 activity via ERK1/2.** We collected the conditional medium from the above treatment was for gelatin zymography assay as the Methods. The results showed that hCG $\beta$  increased MMP-2 activity and PD98059 reduced those effects. \*, indicates  $P < 0.05$  versus control. Data were shown as means  $\pm$  SEM from three separate tests. The lower panel of gel pictures showed an equal loading that a parallel SDS gel was run to test  $\beta$ -actin via Western blot.

doi:10.1371/journal.pone.0054592.g005

## Results

### HCG $\beta$ Expression

First we constructed a control vector as previously described; then DU145 cells were transfected with constructs either with or without hCG $\beta$  cDNA. After establishment of the stable cell lines, cells were maintained in the medium containing 600  $\mu$ g/mL G418 for further studies. To test hCG $\beta$  expression in transfected DU145 cells, both real-time PCR and Western blot were used to determine mRNA and protein expression after the cells were incubated for 24 hours, respectively (Figure 1A, Figure 1B). These results showed that hCG $\beta$  was highly expressed in both mRNA and protein levels versus empty-vector transfected DU145 (DV) cells. Either hCG $\beta$  mRNA or protein amount was little in the control cells under these experimental conditions.

### HCG Secretion

ELISA showed that hCG $\beta$  was secreted into medium tremendously in 24 hours; the amount was up to 150 ng/ml (Figure 2). The amount of hCG $\beta$  secretion was increased by incubation time. Note that we established a stable cell line overexpressing hCG $\beta$ . HCG $\beta$  might play an important role in the signaling between extracellular and intracellular communications.

### HCG $\beta$ Activated ERK1/2

HCG $\beta$  standards was applied to treat non-transfected DU145 cells at doses of 25, 50, 100 and 200 ng/ml for 24 h, Western blot showed that ERK1/2 expression was increased following a dose-dependent trend, and ERK1/2 phosphorylation came to peak with a treatment 200 ng/ml hCG $\beta$  (Figure 3A). Consequently, we treated cells at 0 (CON, control), 5, 15, 30 and 60 min to determine ERK1/2 phosphorylation. The results showed that ERK1/2 phosphorylation followed a time dependent manner and came to peak at 30 min of treatment with 200 ng/ml hCG $\beta$  (Figure 3B). In addition, ERK1/2 phosphorylation was found significantly higher in the hCG $\beta$  transfected DU145 (DH) cells than control cells. However, PD98059 (25  $\mu$ M), a specific blocker, prevented ERK1/2 phosphorylation significantly versus untreated cells (Figure 3C). Note that hCG $\beta$  caused ERK1/2 activation following dose- and time-dependent manners.

### HCG $\beta$ Induced MMP-2 Expression via Activation of ERK1/2

MMP-2 was demonstrated to be involved in cancer cell migration and invasion. Here we investigated hCG $\beta$ -induced MMP-2 expression in the hCG $\beta$  non-transfected DU145 cells. HCG $\beta$  standards was added into the serum-free medium at the doses of 0 (CON, control), 25, 50, 100 and 200 ng/ml. Western blot showed that hCG $\beta$  increased MMP-2 expression in a dose dependent manner, MMP-2 expression was increased to peak when treated with 200 ng/ml hCG $\beta$  (Figure 4A). Furthermore, we treated the cells with PD98059 (25  $\mu$ M), the results showed that MMP-2 expression in DH cells was remarkably downregulated (Figure 4B), indicating that MMP-2 upregulation resulted from ERK1/2 phosphorylation.

### HCG $\beta$ Increased MMP-2 Activity via Activation of ERK1/2

Gelatin zymography assay showed that MMP-2 activity was reduced by PD98059 (25  $\mu$ M) (Figure 5), indicating that hCG $\beta$  activated MMP-2 via ERK1/2 phosphorylation.

### HCG $\beta$ Increased Cell Motility via ERK1/2 Phosphorylation

In the previous study, we demonstrated that hCG $\beta$  induced prostate cancer cell migration and invasion. In the present study we further confirmed how hCG $\beta$  induced cell migratory and invasive behaviors. To know whether hCG $\beta$  induced cell motility resulted from ERK1/2 phosphorylation, the migration and invasion assays were conducted either with or without PD98059 (25  $\mu$ M). The exact methods were as described in the Methods. Results showed that hCG $\beta$  significantly increased both cell migration and invasion; but PD98059 significantly decreased those effects (Figure 6A, Figure 6B). Note that hCG $\beta$  exactly accelerated cell migration and invasion via ERK1/2 phosphorylation.

## Discussion

Prostate cancer accounts for 29% of all cancers in men [25]. Prostate cancer cells have a striking tendency to metastasis, and metastasis is the major cause of mortality for cancer patients [26]. Therefore, it is necessary to find and characterize the molecular targets to inhibit invasion and metastasis via gene targeting.

HCG $\beta$  is a significant marker of malignant transformation. Almost every human cancer produces hCG $\beta$  to some extent [27]. Studies showed that hCG $\beta$  promotes cancer cell proliferation and might also promote metastasis. For instance, Laurence A Cole discovered that hCG $\beta$  can compete with a TGF $\beta$  to bind a TGF $\beta$  receptor, as a TGF $\beta$  receptor antagonism to control apoptosis and

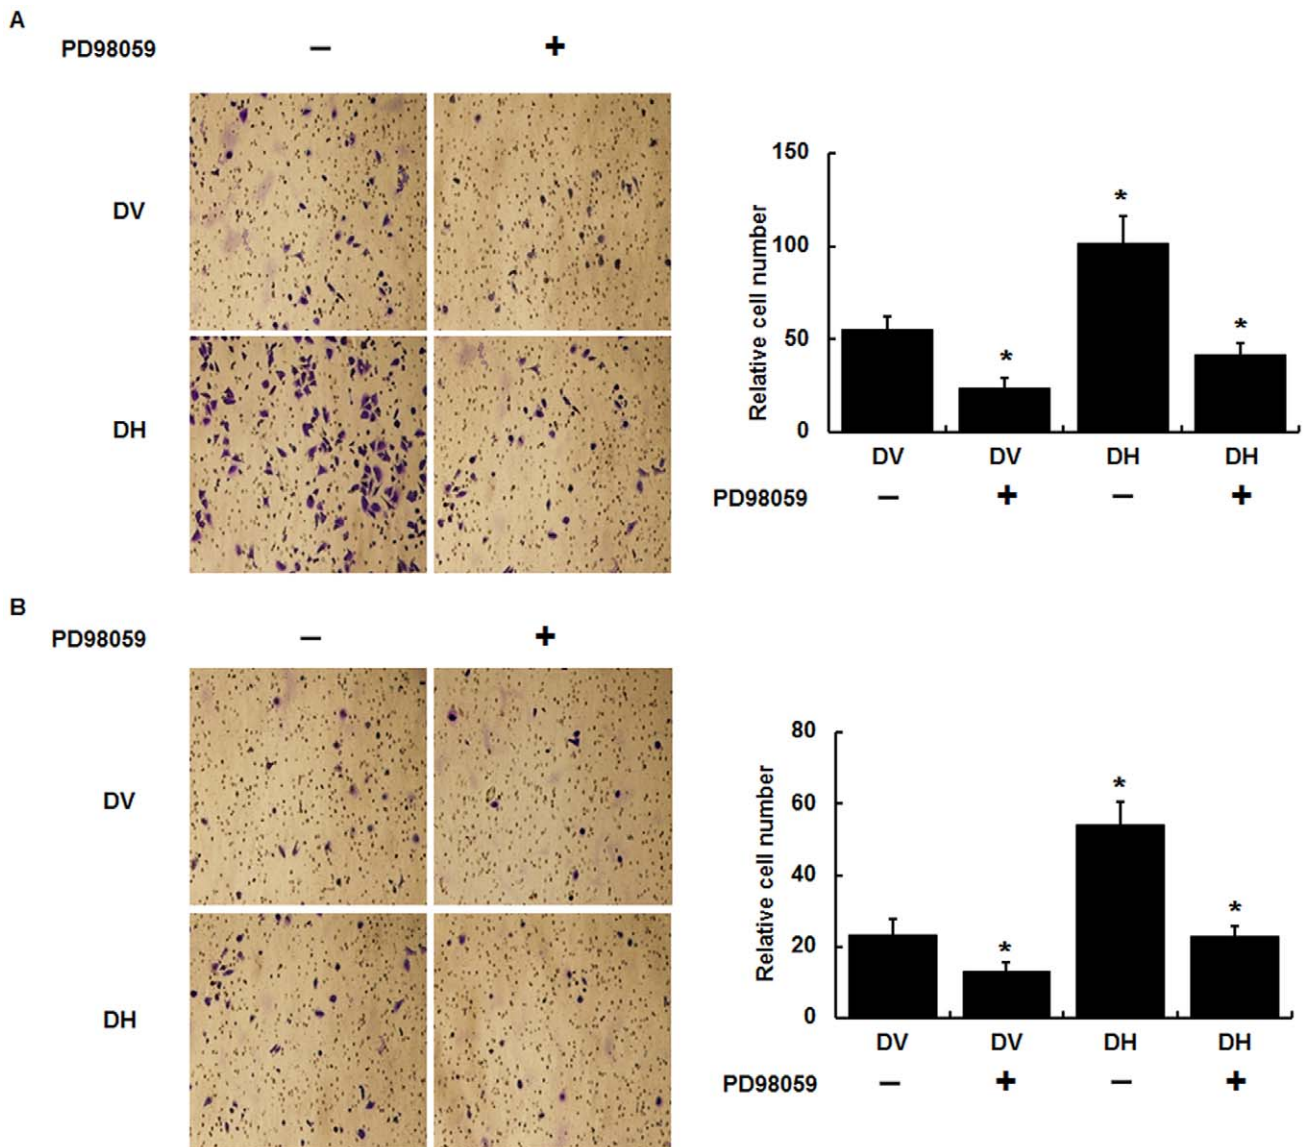

**Figure 6. HCG $\beta$  promotes cell migration and invasion.** (A) We seeded  $1 \times 10^5$  cells in a 24-well plate with cell inserts, the cells were added with/without PD98059(25  $\mu$ M) for 6 h to detect cell migration, the results showed that hCG $\beta$  promotes cell migration significantly versus control. (B) In the same conditions we incubated the cells in the invasion chamber with artificial basement membrane, the cells were added with/without PD98059(25  $\mu$ M) for 12 h to detect cell invasion, the results showed that hCG $\beta$  promotes cell invasion significantly. All procedures were performed as described in Methods. \*, indicates  $P < 0.05$  versus control. Data were shown as means  $\pm$  SEM from three separate tests. doi:10.1371/journal.pone.0054592.g006

promote invasion by activating metalloproteinases [28]. Also, another report showed that hCG $\beta$  and VEGF play a co-ordinated role through their angiogenic and invasive properties in the development of Barrett's adenocarcinomas [29]. Through the above results we can infer that hCG $\beta$  might play an important role in cancer-promoting via multiple signaling pathways. Thus, it is essential to investigate hCG $\beta$ -triggered signaling pathways in tumor migration and invasion.

In the previous study we demonstrated that hCG $\beta$  changed cancer cell morphology, accelerating cell motility, downregulating migration-inhibiting protein E-cadherin, promoting human prostate cancer migration and invasion [11]. However, the further mechanisms to cause migration and invasion keep unknown. In the present study, we found that some signaling pathways were related to migration and invasion. Here we demonstrated that

hCG $\beta$  upregulated ERK1/2 and MMP-2 leading to cell migration and invasion. Using the ERK1/2 phosphorylation blocker PD98059, we discovered that MMP-2 upregulation resulted from ERK1/2 phosphorylation. ERK1/2 have been proved to contribute to tumor proliferation, migration and metastasis, and several studies reported that hCG promoted the ERK1/2 activation in some cell types [30,31]. Obviously, these results are consistent with our results that hCG induced ERK1/2 phosphorylation in a dose- and time-dependent manners in DU145 cells. The ERK related pathway is one of the most critical signaling pathways in tumor occurrence, development and clonal expansion. Particularly, MMP-2 is the key molecule in tumor invasion. Our findings that hCG $\beta$  activated MMP-2 via ERK1/2 phosphorylation in DU145 cells are very important. These results not only revealed the relationship between hCG $\beta$  and cancer, but

also indicated that we found a novel key pathway to inhibit cancer. Obviously the hCG $\beta$ /ERK1/2/MMP-2 pathway is vital in tumor invasion, at least in prostate cancer. In other words, we found more useful approaches to inhibit tumor invasion, and further we can develop molecular target drugs.

hCG is composed of two subunits, hCG $\alpha$  and hCG $\beta$ . These two subunits make a complex, which binds to luteinizing hormone receptor and triggers signaling pathways. However, we do not know if hCG $\beta$  also binds to luteinizing hormone receptor separately. This study gave us the new clue and will push us to characterize hCG $\beta$  specific receptor.

Besides, MMPs were regarded to be metastasis-promoting molecules with many kinds of isoforms. They have potentials to degrade the extracellular matrix and basement membrane. MMP-2 has been implicated to be a key member in MMPs. More, ERK1/2 might translocate to the nucleus and activate some transcriptional factor AP-1 to regulate gene transcription [32]. AP-1 locates in the MMP-2 promoter region of MMP-2 gene, thus, ERK1/2 might promote MMP-2 transcription and release [33,34]. Hence, in order to investigate the role of ERK1/2 in regulating the cell migration and invasion, we successfully determined MMP-2 expression and activity. We found that hCG $\beta$  significantly increased MMP-2 expression and activity. These effects were remarkably repressed by PD98059 in hCG $\beta$  transfected DU145 cells. These results showed a crosstalk between ERK1/2 and MMP-2. Coincidentally, we also found that hCG $\beta$  promoted ERK1/2 phosphorylation and MMP-2 expression following the same dose and time patterns. These results indicated that hCG $\beta$  triggered ERK1/2 activation resulted in MMP-2 upregulation and increased MMP-2 activity. Consequently, hCG $\beta$ -caused migration and invasion resulted from ERK1/2 activation. However, we have no sufficient evidence whether

hCG $\beta$ -caused MMP-2 upregulation plays a major role in migration and invasion. Transfection with MMP-2 construct and knock out of MMP-2 study might help to answer these questions. Further characterization of hCG $\beta$  signaling will assist us to find more metastasis markers to meet the therapeutic requirements.

Actually, some experts have started the research on hCG $\beta$  related antibodies in the field of cancer [35,36]. Here we uncovered that hCG $\beta$  phosphorylated ERK1/2 and further upregulated MMP-2 to increase cancer motility in prostate cancer cells. Our results may give new insights into the molecular mechanisms of hCG $\beta$  regulation, and provide a stronger basis for the hCG $\beta$  related research on the tumor suppressor agent.

We found a few new molecular targets to inhibit invasion and metastasis of prostate cancer. Effective treatment of prostate cancer is of great significance. Blocking hCG $\beta$  signaling is a potential therapeutic strategy to treat prostate cancer and other cancers. Further work needs to characterize hCG $\beta$  receptor; development of hCG $\beta$  signaling blockers will be a prospective field to lower invasion and metastasis.

## Acknowledgments

We thank Dr. Ameae Walker, University of California, Riverside for her kind direction in the original project design. We also thank Dr. Tao Jiang, Tiantan Hospital, Capital Medical University for his assistance in the experiments.

## Author Contributions

Contributed reagents/materials/analysis tools: YZ. Conceived and designed the experiments: WW. Performed the experiments: ZL CL. Analyzed the data: LD. Wrote the paper: ZL CL WW.

## References

- Ilic D, Misso M (2012) Lycopene for the prevention and treatment of benign prostatic hyperplasia and prostate cancer: A systematic review. *Maturitas* 72: 269–276.
- Liu D, Lehmann HP, Frick KD, Carter HB (2012) Active surveillance versus surgery for low risk prostate cancer: A clinical decision analysis. *The Journal of Urology* 187: 1241–1246.
- Leahy M, Krishnasamy M, Herschtal A, Bressel M, Dryden T, et al. (2012) Satisfaction with nurse-led telephone follow up for low to intermediate risk prostate cancer patients treated with radical radiotherapy. A comparative study. *European Journal of Oncology Nursing*. <http://ac.els-cdn.com/S1462388912000324/1-s2.0-S1462388912000324-main.pdf>. Accessed 2012 May 17.
- Armstrong AJ, George DJ (2008) New drug development in metastatic prostate cancer. *Urologic Oncology: Seminars and Original Investigations* 26: 430–437.
- Darwish OM, Raj GV (2012) Management of biochemical recurrence after primary localized therapy for prostate cancer. <http://www.ncbi.nlm.nih.gov/pmc/articles/PMC3358653/pdf/fonc-02-00048.pdf>. Accessed 2012 May 23.
- Chiu HW, Chen YA, Ho SY, Wang YJ (2012) Arsenic trioxide enhances the radiation sensitivity of androgen-dependent and -independent human prostate cancer cells. *PLoS ONE*. <http://www.ncbi.nlm.nih.gov/pmc/articles/PMC3282747/pdf/pone.0031579.pdf>. Accessed 2012 Feb 20.
- de Medeiros SF, Norman RJ (2008) Human chorionic gonadotropin protein core and sugar branches heterogeneity: basic and clinical insights. *Human Reproduction Update* 15: 69–95.
- Iles RK, Delves PJ, Butler SA (2010) Does hCG or hCG $\beta$  play a role in cancer cell biology? *Molecular and Cellular Endocrinology* 329: 62–70.
- Massart C, Lucas C, Rioux-Leclercq N, Fergelot P, Pouvreau-Quillien V, et al. (2005) Importance of the detection method for intact dimeric human chorionic gonadotropin without interference with the free human chorionic gonadotropin beta subunit for pregnancy exclusion before liver transplantation in a woman with cholangiocarcinoma. *Clin Chem Lab Med* 43: 886–889.
- Nishimura R, Koizumi T, Das H, Takemori M, Hasegawa K (2001) Enzyme immunoassay of urinary  $\beta$ -core fragment of human chorionic gonadotropin as a tumor marker for ovarian cancer. *Methods Mol Med* 39: 135–141.
- Wu W, Walker AM (2006) Human chorionic gonadotropin  $\beta$  (hCG $\beta$ ) down-regulates E-cadherin and promotes human prostate carcinoma cell migration and invasion. *Cancer* 106: 68–78.
- Manna PR, Jo Y, Stocco DM (2007) Regulation of Leydig cell steroidogenesis by extracellular signal-regulated kinase 1/2: role of protein kinase A and protein kinase C signaling. *Journal of Endocrinology* 193: 53–63.
- Tan CT, Chu CY, Lu YC, Chang CC, Lin BR, et al. (2008) CXCL12/CXCR4 promotes laryngeal and hypopharyngeal squamous cell carcinoma metastasis through MMP-13-dependent invasion via the ERK1/2/AP-1 pathway. *Carcinogenesis* 29: 1519–1527.
- Chen YY, Liu FC, Chou PY, Chien YC, Chang WS, et al. (2012) Ethanol extracts of fruiting bodies of *antrodia cinnamomea* suppress CL1–5 human lung adenocarcinoma cells migration by inhibiting matrix metalloproteinase-2/9 through ERK, JNK, p38, and PI3K/Akt signaling pathways. *Evidence-Based Complementary and Alternative Medicine*. <http://www.ncbi.nlm.nih.gov/pmc/articles/PMC3291113/pdf/ECAM2012-378415.pdf>. Accessed 2012 Feb 21.
- Babykutty S, Suboj P, Srinivas P, Nair AS, Chandramohan K, et al. (2012) Insidious role of nitric oxide in migration/invasion of colon cancer cells by upregulating MMP-2/9 via activation of cGMP-PKG-ERK signaling pathways. *Clinical & Experimental Metastasis* 29: 471–492.
- Wilkins-Port CE, Higgins SP, Higgins CE, Kobori-Hotchkiss I, Higgins PJ (2012) Complex regulation of the pericellular proteolytic microenvironment during tumor progression and wound repair: functional interactions between the serine protease and matrix metalloproteinase cascades. *Biochemistry Research International*. <http://www.ncbi.nlm.nih.gov/pmc/articles/PMC3290807/pdf/BCRI2012-454368.pdf>. Accessed 2012 Feb 20.
- Fluhr H, Bischof-Islami D, Krenzer S, Licht P, Bischof P, et al. (2008) Human chorionic gonadotropin stimulates matrix metalloproteinases-2 and -9 in cytotrophoblastic cells and decreases tissue inhibitor of metalloproteinases-1, -2, and -3 in decidualized endometrial stromal cells. *Fertility and Sterility* 90: 1390–1395.
- Prast J, Saleh L, Husslein H, Sonderegger S, Helmer H, et al. (2007) Human chorionic gonadotropin stimulates trophoblast invasion through extracellularly regulated kinase and AKT signaling. *Endocrinology* 149: 979–987.
- Reis ST, Pontes-Junior J, Antunes AA, de Sousa-Canavez JM, Dall'Oglio MF, et al. (2011) MMP-9 overexpression due to TIMP-1 and RECK underexpression is associated with prognosis in prostate cancer. *Int J Biol Markers* 26: 255–261.
- Aalinkel R, Nair BB, Reynolds JL, Sykes DE, Mahajan SD, et al. (2011) Overexpression of MMP-9 contributes to invasiveness of prostate cancer cell line LNCaP. *Immunol Invest* 40: 447–464.

21. Dashevsky O, Varon D, Brill A (2009) Platelet-derived microparticles promote invasiveness of prostate cancer cells via upregulation of MMP-2 production. *International Journal of Cancer* 124: 1773–1777.
22. Stio M, Martinesi M, Simoni A, Zuegel U, Steinmeyer A, et al. (2011) The novel vitamin D analog ZK191784 inhibits prostate cancer cell invasion. *Anticancer Res* 31: 4091–4098.
23. Tokar EJ, Webber MM (2005) Cholecalciferol (Vitamin D3) inhibits growth and invasion by up-regulating nuclear receptors and 25-Hydroxylase (CYP27A1) in human prostate cancer cells. *Clinical & Experimental Metastasis* 22: 275–284.
24. Bao BY (2005) 1,25-dihydroxyvitamin D3 inhibits prostate cancer cell invasion via modulation of selective proteases. *Carcinogenesis* 27: 32–42.
25. Barqawi AB, Krughoff KJ, Eid K (2012) Current challenges in prostate cancer management and the rationale behind targeted focal therapy. *Advances in Urology*. <http://www.ncbi.nlm.nih.gov/pmc/articles/PMC3357537/pdf/AU2012-862639.pdf>. Accessed 2012 May 10.
26. Yu HS, Lin TH, Tang CH (2012) Bradykinin enhances cell migration in human prostate cancer cells through B2 receptor/PKC $\delta$ /c-Src dependent signaling pathway. *Prostate* 73: 89–100.
27. Cole LA (2009) Human chorionic gonadotropin and associated molecules. *Expert Rev Mol Diagn* 9: 51–73.
28. Cole LA (2012) HCG variants, the growth factors which drive human malignancies. *Am J Cancer Res* 2: 22–35.
29. Couvelard A, Paraf F, Vidaud D, Dubois S, Vidaud M, et al. (2004) Human chorionic gonadotropin beta expression in malignant Barrett's oesophagus. *Virchows Arch* 445: 279–284.
30. Tsai EM, Chan TF, Chen YH, Hsu SC, Chuang CY, et al. (2008) Mifepristone attenuates human chorionic gonadotropin-induced extracellular signal-regulated kinase 1/2 phosphorylation, cyclooxygenase-2, and prostaglandin E2 production in human granulosa luteal cells. *Fertility and Sterility* 89: 1522–1529.
31. Martinelle N, Holst M, Söder O, Svechnikov K (2004) Extracellular signal-regulated kinases are involved in the acute activation of steroidogenesis in immature rat Leydig cells by human chorionic gonadotropin. *Endocrinology* 145: 4629–4634.
32. Song MO, Lee CH, Yang HO, Freedman JH (2012) Endosulfan upregulates AP-1 binding and ARE-mediated transcription via ERK1/2 and p38 activation in HepG2 cells. *Toxicology* 292: 23–32.
33. Fong Y, Shen KH, Chiang TA, Shih YW (2010) Acacetin inhibits TPA-induced MMP-2 and u-PA expressions of human lung cancer cells through inactivating JNK signaling pathway and reducing binding activities of NF-kappaB and AP-1. *Journal of Food Science* 75: H30–38.
34. Kim Y, Jeoung D (2009) The cancer/testis antigen CAGE induces MMP-2 through the activation of NF-kB and AP-1. *BMB Rep* 42: 758–763.
35. Jiang C, Jiang Y, Huang Z, Shen W, Wang J, et al. (2010) Evaluation of the immunogenicity of a single chain chimeric peptide composed of hCG $\beta$  and oLH $\alpha$  for inhibition of the growth of hCG $\beta$ -expressing cancer cells. *Cancer Immunology, Immunotherapy* 59: 1771–1779.
36. Khare P, Singh O, Jain SK, Javed S, Pal R (2012) Inhibitory effect of antibodies against human chorionic gonadotropin on the growth of colorectal tumour cells. *Indian J Biochem Biophys* 49: 92–96.
